# Supplementary material for: Photoporation of Biomolecules into Single Cells in Living Vertebrate Embryos Induced by a Femtosecond Laser Amplifier
Source: PubMed Central journal article supplement (PMC3218030; doi:10.1371/journal.pone.0027677), 2011-11-16
Supplement: pone.0027677.s001.pdf [file pone.0027677.s001.pdf]

## A fs laser-mediated introduction into a thin sample with high transparency

Focal spot size:  $\sim 1 \mu\text{m}$   
Pulse energy density:  $\sim 0.1 \text{ J/cm}^2$  pulse

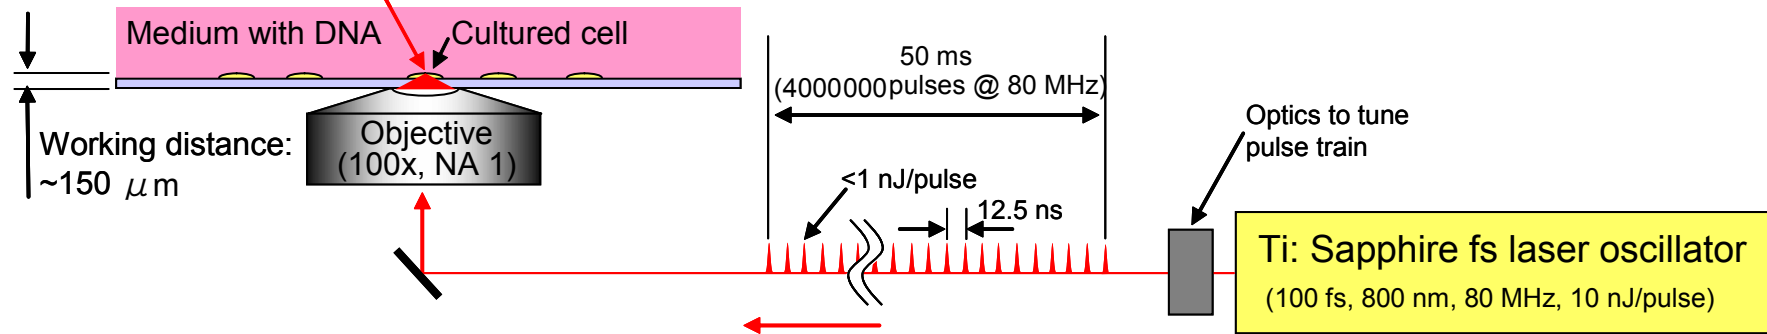

## B fs laser-mediated introduction into a thick sample with low transparency

Focal spot size:  $\sim 10 \mu\text{m}$   
Pulse energy density:  $0.4 \sim 1 \text{ J/cm}^2$  pulse

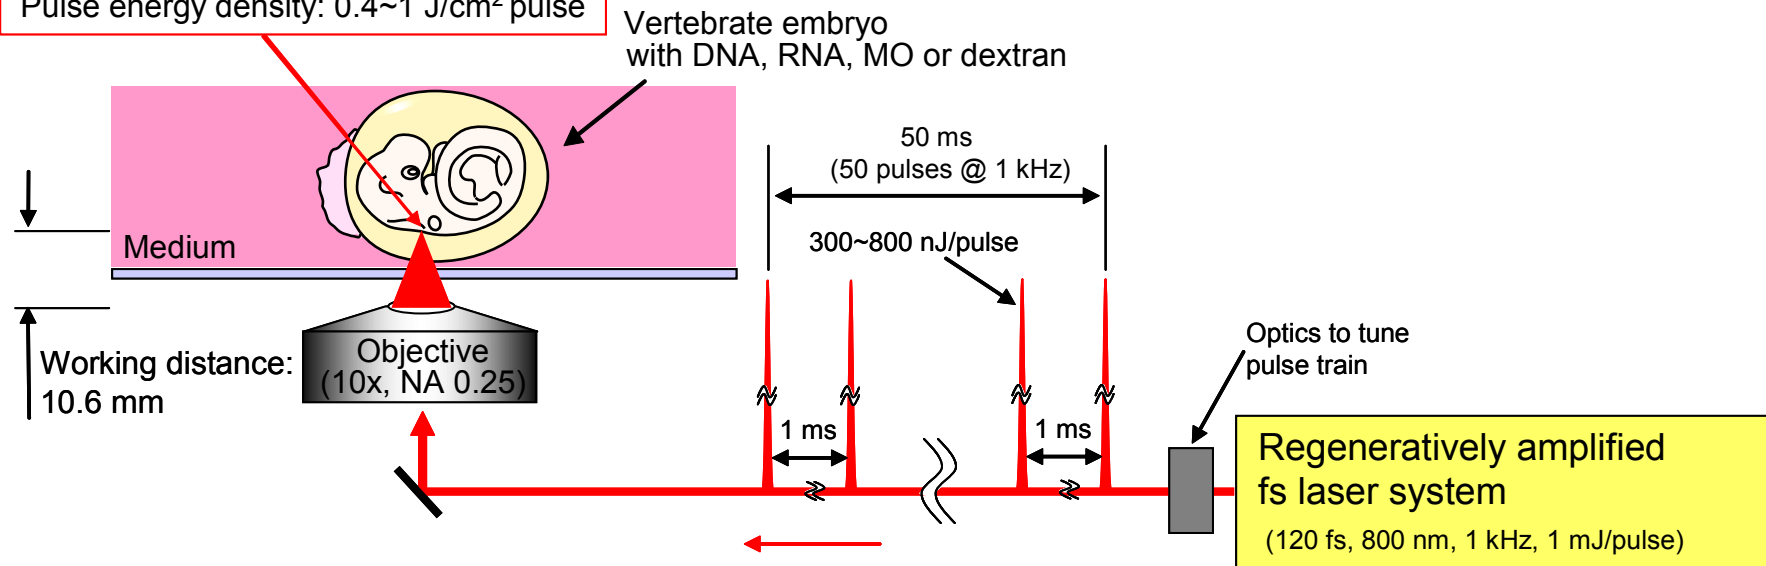

Fig. S1 Hosokawa et al.
