# Supplementary material for: Photoporation of Biomolecules into Single Cells in Living Vertebrate Embryos Induced by a Femtosecond Laser Amplifier
Source: PubMed Central journal article supplement (PMC3218030; doi:10.1371/journal.pone.0027677), 2011-11-16
Supplement: pone.0027677.s002.pdf [file pone.0027677.s002.pdf]

## A Optimal pulse energy allows delivery of molecules to single cell

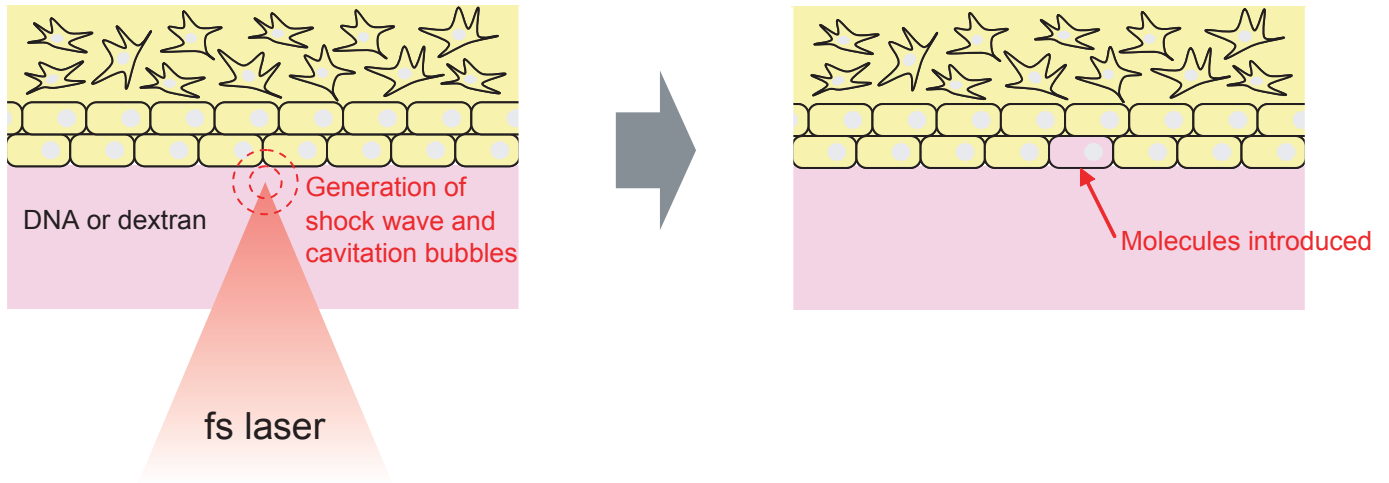

## B High pulse energy induces cell dispersion

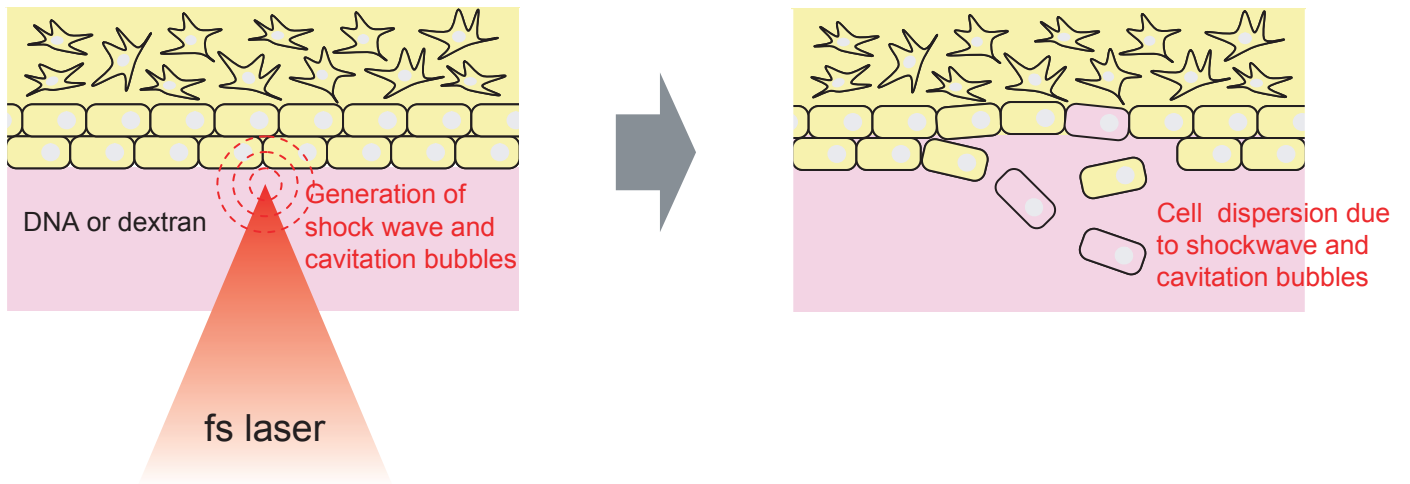

Fig. S2 Hosokawa et al.
